# Supplementary material for: Synthesis of three-dimensional free-standing WSe2/C hybrid nanofibers as anodes for high-capacity lithium/sodium ion batteries
Source: Royal Society of Chemistry journal article supplement (doi:10.1039/c9ta06199a), 2019-01-01
Supplement: c9ta06199a1.pdf [file c9ta06199a1.pdf]

**Synthesis of three-dimensional free-standing WSe<sub>2</sub>/C hybrid nanofibers as  
anodes for high-capacity lithium/sodium ion batteries**

Jing Li<sup>1</sup>, Shaobo Han<sup>2</sup>, Junwei Zhang<sup>3</sup>, Junxiang Xiang<sup>1</sup>, Xingqun Zhu<sup>1</sup>, Ping Liu<sup>1</sup>,  
Xuefeng Li<sup>1</sup>, Chao Feng<sup>1</sup>, Bin Xiang<sup>1\*</sup>, Meng Gu<sup>2\*</sup>

<sup>1</sup>Hefei National Research Center for Physical Sciences at the Microscale, Department  
of Materials Science & Engineering, CAS Key Lab of Materials for Energy Conversion,  
University of Science and Technology of China, Hefei, Anhui 230026, China

<sup>2</sup>Department of Materials Science and Engineering, Southern University of Science and  
Technology, Shenzhen, 518055, China

<sup>3</sup>Key Laboratory of Magnetism and Magnetic Materials of the Ministry of Education,  
School of Physical Science and Technology and Electron Microscopy Centre of  
Lanzhou University, Lanzhou University, Lanzhou 730000, China

\*Corresponding author: [binxiang@ustc.edu.cn](mailto:binxiang@ustc.edu.cn); [gum@sustc.edu.cn](mailto:gum@sustc.edu.cn)

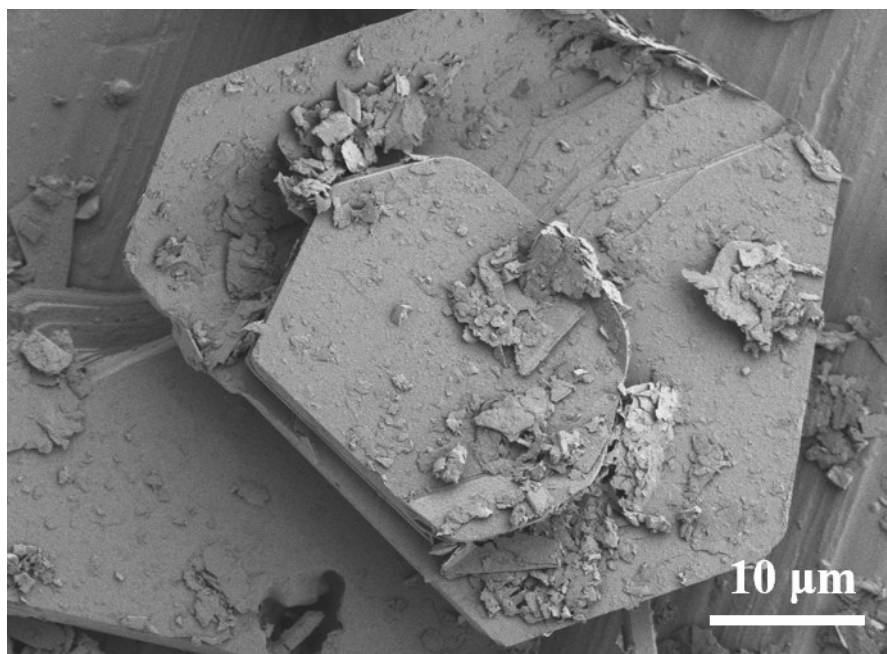

**Fig. S1** The SEM image of bulk WSe<sub>2</sub>-C composites.

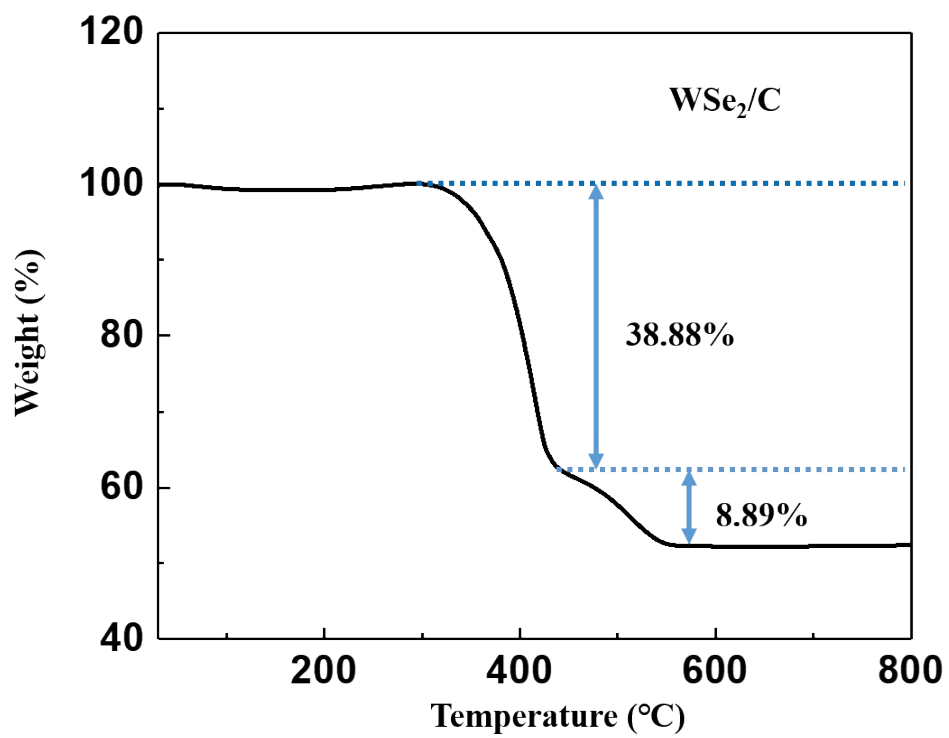

**Fig. S2** TGA curve of WSe<sub>2</sub>/C nanofibers from 25 °C to 800 °C with a rate of 10 °C min<sup>-1</sup> under air.

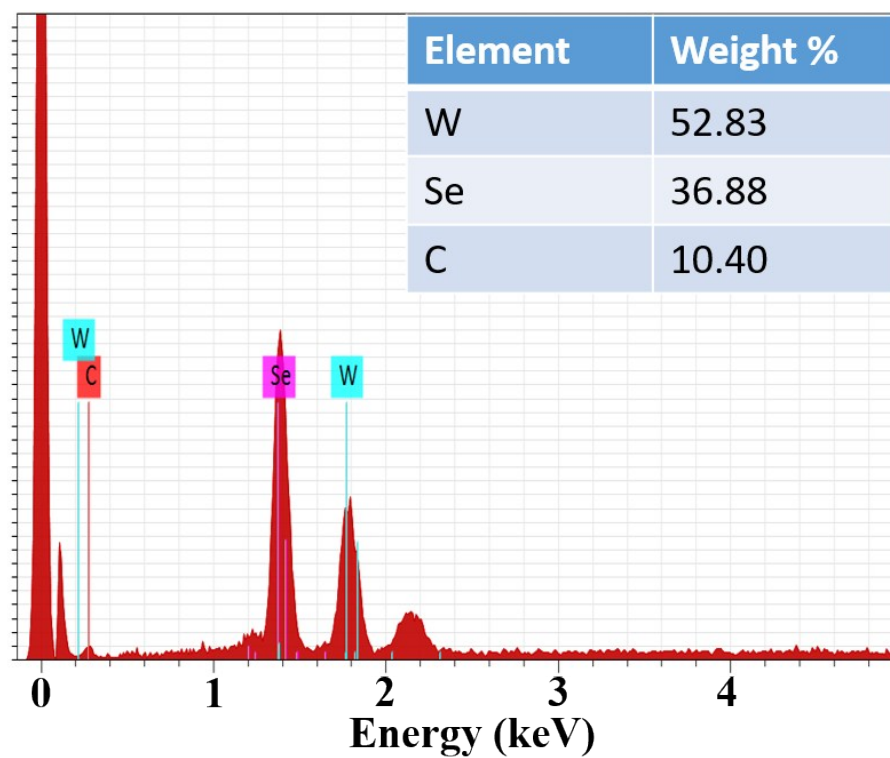

**Fig. S3** The EDS spectrum of the B-WSe<sub>2</sub>-C.

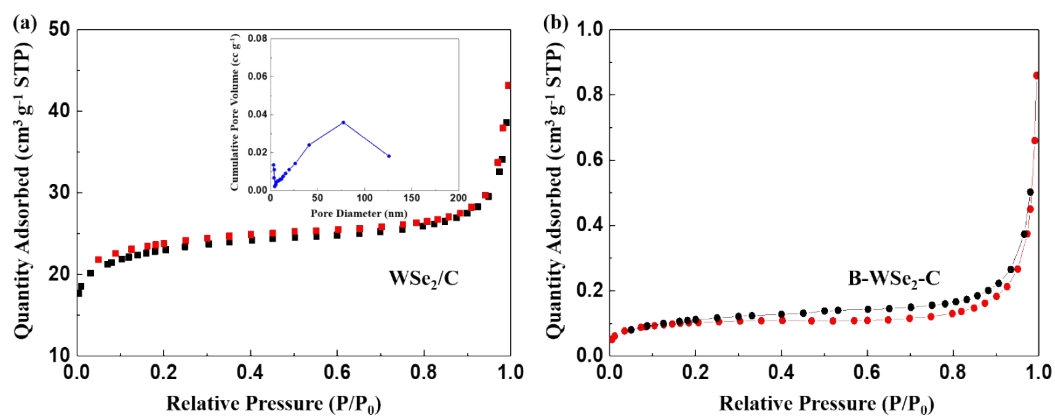

**Fig. S4** The  $N_2$  adsorption and desorption isotherms of (a)  $WSe_2/C$  composites and (b)  $B-WSe_2-C$ . Inset image in (a) is the pore-size distribution curve of the  $WSe_2/C$  nanofibers.

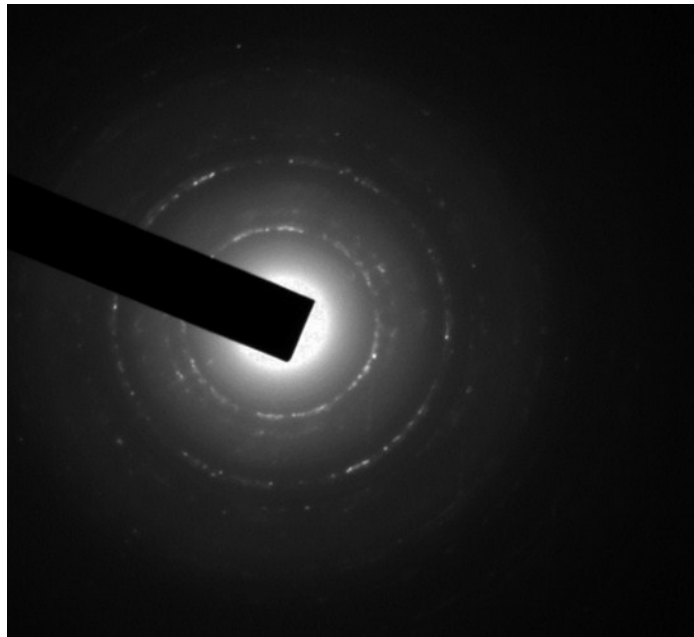

**Fig. S5** The SAED pattern of WSe<sub>2</sub>/C nanofibers before lithiation.

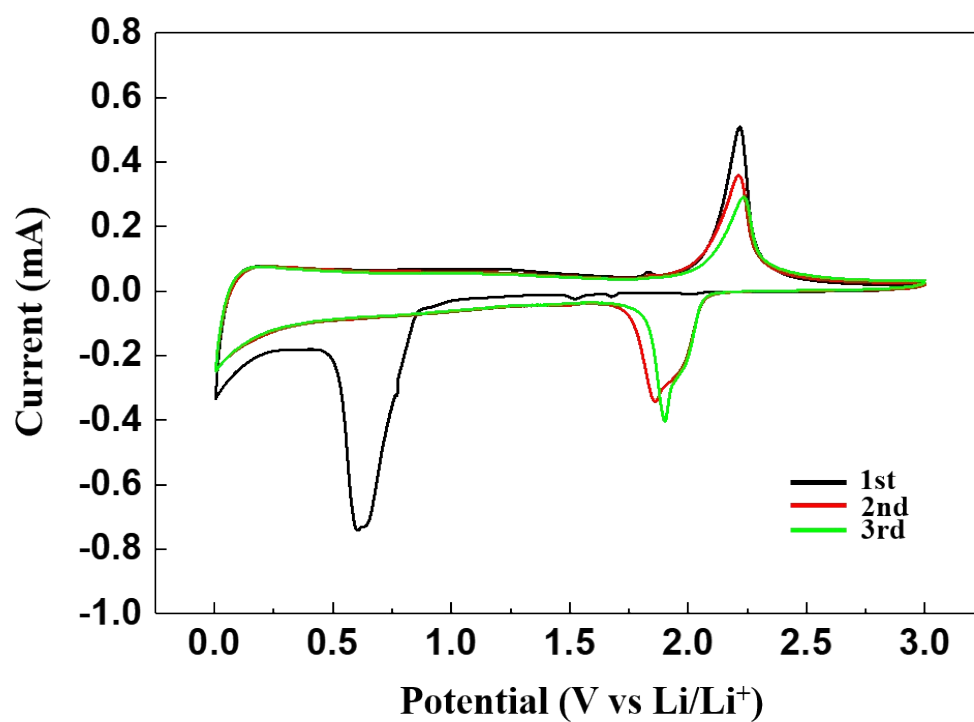

**Fig. S6** The CV curves of B-WSe<sub>2</sub>-C electrode in initial three cycles with a scan rate of 0.1 mV s<sup>-1</sup>.

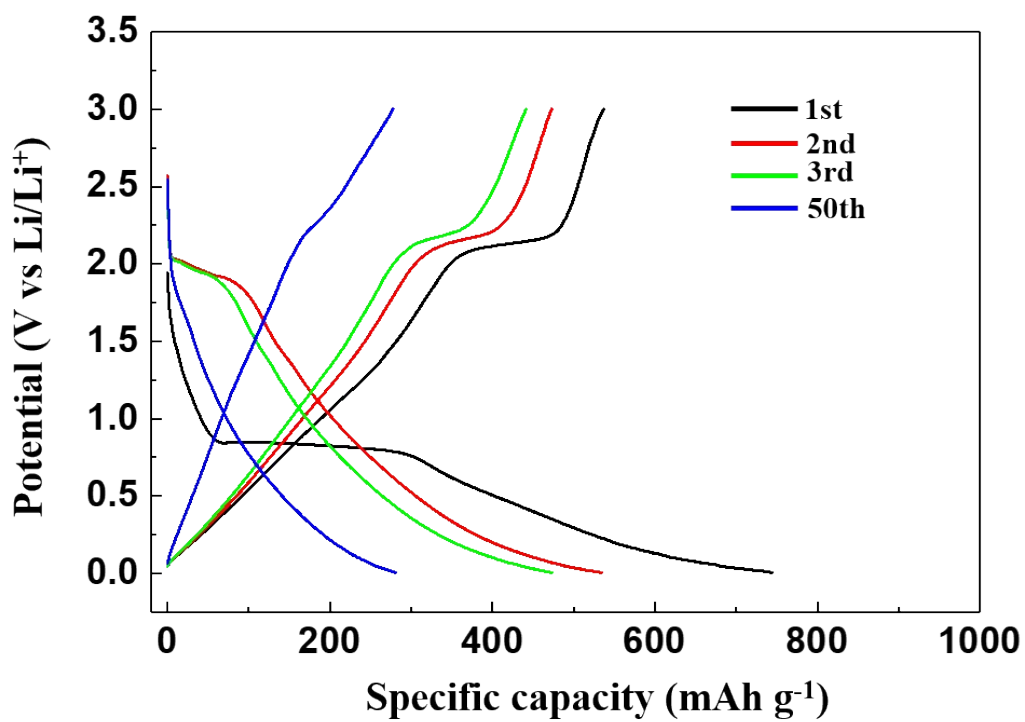

**Fig. S7** The charge-discharge curves of the B-WSe<sub>2</sub>-C in the voltage range of 0.005-3 V vs Li/Li<sup>+</sup> at a scan rate of 0.1 mV s<sup>-1</sup>.



| Materials                                  | Current density (A g <sup>-1</sup> ) | Cycle number | Capacity (mAh g <sup>-1</sup> ) | References |
|--------------------------------------------|--------------------------------------|--------------|---------------------------------|------------|
| WSe <sub>2</sub>                           | 0.03                                 | 30           | 400                             | S1         |
| WSe <sub>2</sub>                           | 1                                    | 1500         | 224.9                           | S2         |
| WSe <sub>2</sub> /CMK-5                    | 0.5                                  | 600          | 490                             | S3         |
| WSe <sub>2</sub> /rGO                      | 0.063                                | 80           | 528                             | S4         |
| 1T@2H<br>WS <sub>2</sub> @CFC              | 2                                    | 800          | 510                             | S5         |
| NDG-MoS <sub>2</sub> -<br>NDG              | 1                                    | 600          | 552                             | S6         |
| MoS <sub>2</sub> -<br>MoSe <sub>2</sub> @C | 0.1                                  | 100          | 680                             | S7         |
| MoSe <sub>2</sub> /N-C                     | 8                                    | 200          | 277                             | S8         |
| ReS <sub>2</sub> /N-CNFs                   | 0.1                                  | 400          | 440                             | S9         |
| WSe <sub>2</sub> /C                        | 0.1                                  | 100          | 608.3                           | This work  |
|                                            | 25                                   | 10000        | 257                             |            |

**Table. S1** Comparison of the lithium storage performance of our work to other transition metal dichalcogenides.

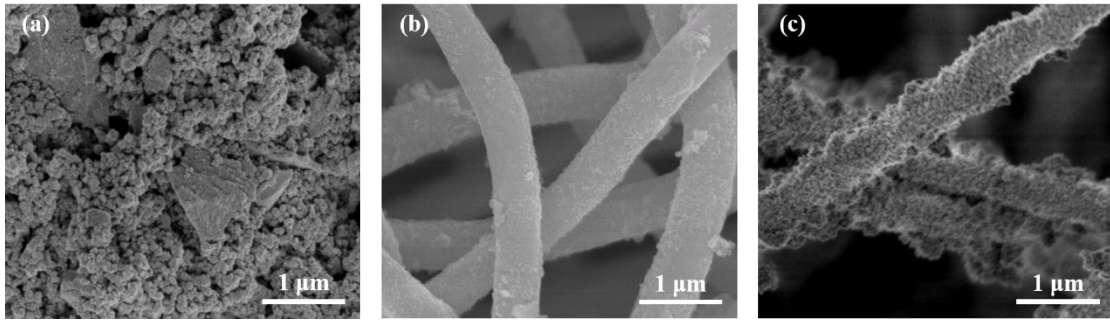

**Fig. S8** SEM images of (a) the B-WSe<sub>2</sub>-C composites after 10 cycles at current density of 0.1 A g<sup>-1</sup> (b) WSe<sub>2</sub>/C nanofibers after 10 cycles at a current density of 0.1 A g<sup>-1</sup>. (c) The SEM image of WSe<sub>2</sub>/C after 2000 cycles at a current density of 25 A g<sup>-1</sup>.

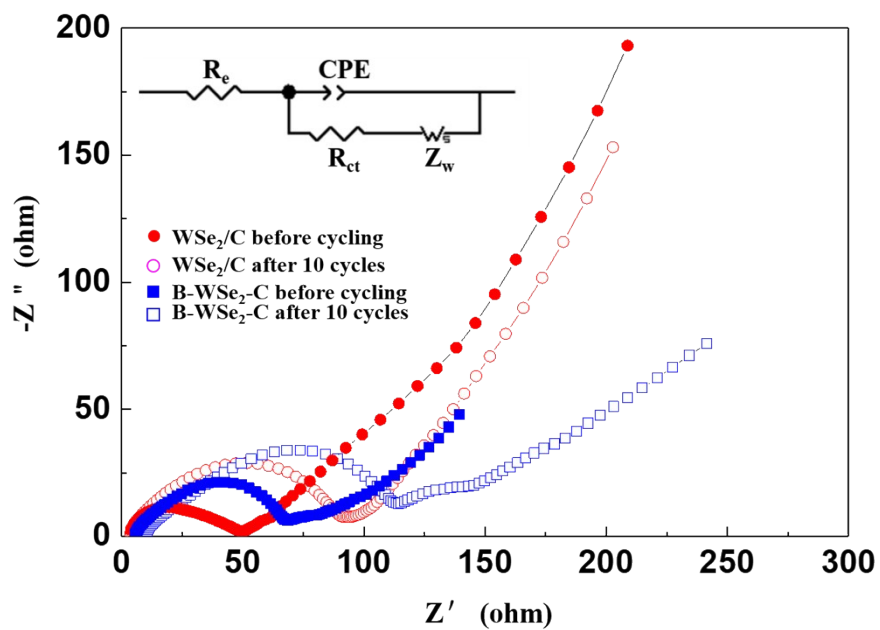

**Fig. S9** Electrochemical impedance spectroscopy of WSe<sub>2</sub>/C and B-WSe<sub>2</sub>-C electrodes before and after cycling. The inset image is the equivalent circuit of the system.

| Sample                                | $R_e$ ( $\Omega$ ) | $R_{ct}$ ( $\Omega$ ) |
|---------------------------------------|--------------------|-----------------------|
| WSe <sub>2</sub> /C before cycling    | 1.05               | 47.55                 |
| WSe <sub>2</sub> /C after 10 cycles   | 2.76               | 90.42                 |
| B-WSe <sub>2</sub> -C before cycling  | 5.95               | 61.17                 |
| B-WSe <sub>2</sub> -C after 10 cycles | 9.50               | 111.80                |

**Table. S2** The fitted parameters of the  $R_e$  and  $R_{ct}$  of the WSe<sub>2</sub>/C and B-WSe<sub>2</sub>-C.

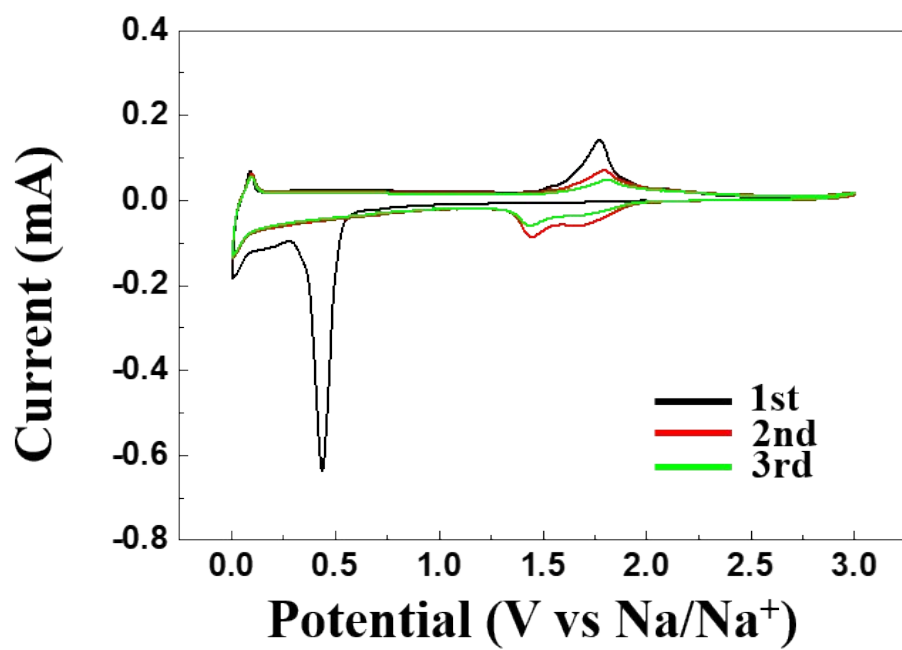

**Fig. S10** The CV curves of the B-WSe<sub>2</sub>-C in the voltage range of 0.005-3 V vs Na/Na<sup>+</sup> at a scan rate of 0.1 mV s<sup>-1</sup>.

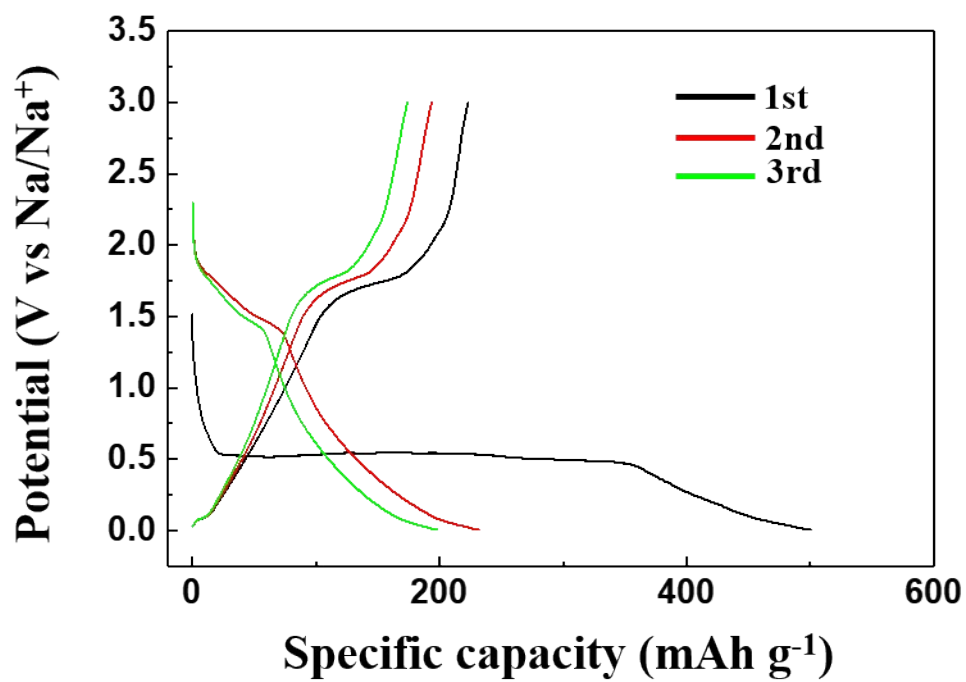

**Fig. S11** The discharge-charge curves of B-WSe<sub>2</sub>-C in a potential range of 0.005-3 V vs Na/Na<sup>+</sup>.

| Materials                     | Current density (A g <sup>-1</sup> ) | Cycle number | Capacity (mAh g <sup>-1</sup> ) | References       |
|-------------------------------|--------------------------------------|--------------|---------------------------------|------------------|
| WSe <sub>2</sub>              | 0.02                                 | 30           | 190                             | S10              |
| WSe <sub>2</sub>              | 0.4                                  | 50           | 400                             | S11              |
| WSe <sub>2</sub> /C           | 0.2                                  | 50           | 270                             | S12              |
| 1T MoS <sub>2</sub> /Graphene | 0.05                                 | 200          | 313                             | S13              |
| MoSe <sub>2</sub> /N-C        | 0.1                                  | 120          | 552.1                           | S14              |
| WS <sub>2</sub> /CNT-rGO      | 0.2                                  | 100          | 252.9                           | S15              |
| VS <sub>2</sub> -SNSs         | 0.2                                  | 100          | 245                             | S16              |
| ReS <sub>2</sub>              | 0.1                                  | 800          | 245                             | S17              |
| NbS <sub>2</sub>              | 0.5                                  | 100          | 157                             | S18              |
| WSe <sub>2</sub> /C           | 0.1                                  | 100          | 257.8                           | <b>This work</b> |

**Table. S3** Comparison of the sodium storage properties of our materials with reported transition metal dichalcogenides.

## References

- S1 Y.Y. Lee, G.O. Park, Y.S. Choi, J.K. Shon, J. Yoon, K.H. Kim, W-S. Yoon, H. Kim, J.M. Kim, *RSC Adv.*, 2016, **6**, 14253-14260.
- S2 W. Yang, J. Wang, C. Si, Z. Peng, Z. Zhang, *Nano Res.*, 2017, **10**, 2584-2598.
- S3 J. Wang, L. Chen, L. Zeng, Q. Wei, M. Wei, *ACS Sustainable Chem. Eng.*, 2018, **6**, 4688-4694.
- S4 X. Wang, J. He, B. Zheng, W. Zhang, Y. Chen, *Electrochim. Acta*, 2018, **283**, 1660-1667.
- S5 T. Wang, C. Sun, M. Yang, L. Zhang, Y. Shao, Y. Wu, X. Hao, *Electrochim. Acta*, 2018, **259**, 1-8.
- S6 B. Chen, Y. Meng, F. He, E. Liu, C. Shi, C. He, L. Ma, Q. Li, J. Li, N. Zhao, *Nano Energy*, 2017, **41**, 154-163.
- S7 J. Yang, J. Zhu, J. Xu, C. Zhang, T. Liu, *ACS Appl. Mater. Interfaces*, 2017, **9**, 44550-44559.
- S8 P. Ge, H. Hou, C.E. Banks, C.W. Foster, S. Li, Y. Zhang, J. He, C. Zhang, X. Ji, *Energy Storage Mater.*, 2018, **12**, 310-323.
- S9 M. Mao, C. Cui, M. Wu, M. Zhang, T. Gao, X. Fan, J. Chen, T. Wang, J. Ma, C. Wang, *Nano Energy*, 2018, **45**, 346-352.
- S10 K. Share, J. Lewis, L. Oakes, R. E. Carter, A. P. Cohn, C. L. Pint, *RSC Adv.*, 2015, **5**, 101262-101267.
- S11 W. Yang, J. Wang, C. Si, Z. Peng, Z. Zhang, *Nano Res.*, 2017, **10**, 2584-2598.
- S12 Z. Zhang, X. Yang, Y. Fu, *RSC Adv.*, 2016, **6**, 12726-12729.
- S13 X. Geng, Y. Jiao, Y. Han, A. Mukhopadhyay, L. Yang, H. Zhu, *Adv. Funct. Mater.*,



2017, **27**, 1702998.

- S14 P. Ge, H. Hou, C. E. Banks, C. W. Foster, S. Li, Y. Zhang, J. He, C. Zhang, X. Ji, *Energy Storage Mater.*, 2018, **12**, 310-323.
- S15 Y. Wang, D. Kong, W. Shi, B. Liu, G. J. Sim, Q. Ge, H. Y. Yang, *Adv. Energy Mater.*, 2016, **6**, 1601057.
- S16 R. Sun, Q. Wei, J. Sheng, C. Shi, Q. An, S. Liu, L. Mai, *Nano Energy*, 2017, **35**, 396-404.
- S17 M. Mao, C. Cui, M. Wu, M. Zhang, T. Gao, X. Fan, J. Chen, T. Wang, J. Ma, C. Wang, *Nano Energy*, 2018, **45**, 346-352.
- S18 X. Ou, X. Xiong, F. Zheng, C. Yang, Z. Lin, R. Hu, C. Jin, Y. Chen, M. Liu, *J. Power Sources*, 2016, **325**, 410-416.
